# Supplementary material
Source: publisher site journal article supplement (https://www.dovepress.com/article/237562)
Supplement: Supplementary file 1 [file get_supplementary_file.php]

**Table S1.** QPCR Primer sequences used, Related to the Materials and methods.

| **Gene Name** | **Forward primer** | **Reverse primer** |
| --- | --- | --- |
| ***Cox2*** | 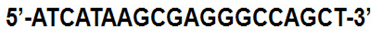 | 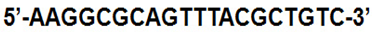 |
| ***Mir-101*** | 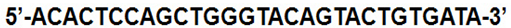 | 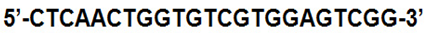 |
|  |  |  |
|  |  |  |
|  |  |  |
